# Supplementary material
Source: Research Square preprint supplement (doi:10.21203/rs.3.rs-9082140/v1)
Supplement: Supplementary file 1 [file 27b56b54054a51023b515c11.docx]

**Article Title:**

Large Language Models and Shifts in Scholarly Writing Style: A Cross-Journal Quantitative Analysis of Ophthalmology Research Articles

**Journal:**

Scientometrics

**Authors:**

Tom Kornhauser, MD (ORCID: https://orcid.org/0000-0002-9140-2982)

Tolossa Tufa Regassa, MD

Morris E. Hartstein, MD, FACS

**Corresponding Author:**

Tom Kornhauser, MD

Department of Ophthalmology

Shamir Medical Center

Zerifin 70300, Israel

Email: tomchook@gmail.com

**Supplementary Table S3. Comparison of style metrics between pre-LLM and post-LLM periods, by journal quartile and pooled.**

| **Metric** | **Quartile** | **No. pre** | **No. post** | **Pre mean** | **Post mean** | **Δ (Post−Pre)** | **95% CI** | **p-value** |
| --- | --- | --- | --- | --- | --- | --- | --- | --- |
| Sentence length | Q1 | 143 | 124 | 18.81 | 17.51 | -1.31 | (-1.94 to -0.67) | <0.01 |
| Q2 | 108 | 93 | 21.77 | 22.98 | 1.21 | (0.30 to 2.13) | 0.01 |
| Q3 | 108 | 93 | 16.67 | 16.69 | 0.02 | (-0.61 to 0.64) | 0.96 |
| Q4 | 105 | 88 | 17.09 | 17.32 | 0.22 | (-0.57 to 1.01) | 0.58 |
| Pooled | 464 | 398 | 18.61 | 18.55 | -0.07 | (-0.44 to 0.30) | 0.72 |
| Word length | Q1 | 143 | 124 | 4.95 | 4.92 | -0.04 | (-0.09 to 0.02) | 0.20 |
| Q2 | 108 | 93 | 4.93 | 4.86 | -0.07 | (-0.13 to 0.00) | 0.04 |
| Q3 | 108 | 93 | 4.88 | 4.87 | -0.01 | (-0.07 to 0.06) | 0.78 |
| Q4 | 105 | 88 | 5.08 | 5.05 | -0.03 | (-0.10 to 0.05) | 0.47 |
| Pooled | 464 | 398 | 4.96 | 4.92 | -0.04 | (-0.07 to 0.00) | 0.03 |
| Type–token ratio | Q1 | 143 | 124 | 0.23 | 0.22 | -0.01 | (-0.02 to 0.00) | <0.01 |
| Q2 | 108 | 93 | 0.27 | 0.27 | 0.01 | (0.00 to 0.02) | 0.21 |
| Q3 | 108 | 93 | 0.27 | 0.27 | 0.01 | (0.00 to 0.02) | 0.14 |
| Q4 | 105 | 88 | 0.28 | 0.26 | -0.01 | (-0.02 to 0.00) | 0.01 |
| Pooled | 464 | 398 | 0.26 | 0.25 | 0.00 | (-0.01 to 0.00) | 0.18 |

Sentence length refers to the average number of words per sentence. Word length is the average number of characters per word. The type–token ratio reflects lexical diversity, calculated as the number of unique words divided by total words. Values were computed at the article level and compared between the pre-LLM (2018–2020) and post-LLM (2023–2025) periods. Δ indicates the estimated mean difference between periods.
