# Supplementary material
Source: Research Square preprint supplement (doi:10.21203/rs.3.rs-9082140/v1)
Supplement: Supplementary file 2 [file 858b9d7a910ffd208890855f.docx]

**Article Title:**

Large Language Models and Shifts in Scholarly Writing Style: A Cross-Journal Quantitative Analysis of Ophthalmology Research Articles

**Journal:**

Scientometrics

**Authors:**

Tom Kornhauser, MD (ORCID: https://orcid.org/0000-0002-9140-2982)

Tolossa Tufa Regassa, MD

Morris E. Hartstein, MD, FACS

**Corresponding Author:**

Tom Kornhauser, MD

Department of Ophthalmology

Shamir Medical Center

Zerifin 70300, Israel

Email: tomchook@gmail.com

**Supplementary Table S1. Lexicon features with post–pre prevalence differences by quartile.**

**Q1**

**Connectors / Transitions**

| **Phrase/Term** | **Prevalence pre (%)** | **Prevalence post (%)** | **Δ Prevalence (%)** | **p-value** | **q-value** |
| --- | --- | --- | --- | --- | --- |
| accordingly | 0.1 | 0.11 | 0.01 | 0.83 | 0.94 |
| collectively | 0.03 | 0.06 | 0.03 | 0.26 | 0.59 |
| collectively our results | 0.0 | 0.0 | 0.0 | — | — |
| consequently | 0.08 | 0.15 | 0.06 | 0.11 | 0.51 |
| furthermore | 0.45 | 0.45 | 0.0 | 0.95 | 0.96 |
| hence | 0.13 | 0.1 | -0.03 | 0.45 | 0.76 |
| in conclusion | 0.5 | 0.25 | -0.25 | <0.01 | **<0.01** |
| in summary | 0.22 | 0.15 | -0.07 | 0.14 | 0.56 |
| moreover | 0.26 | 0.25 | -0.01 | 0.87 | 0.94 |
| nevertheless | 0.22 | 0.19 | -0.03 | 0.53 | 0.80 |
| nonetheless | 0.1 | 0.13 | 0.02 | 0.54 | 0.80 |
| notwithstanding | 0.03 | 0.01 | -0.02 | 0.23 | 0.59 |
| therefore | 0.67 | 0.67 | -0.0 | 0.97 | 0.97 |

**Interpretive / Hedging**

| **Phrase/Term** | **Prevalence pre (%)** | **Prevalence post (%)** | **Δ Prevalence (%)** | **p-value** | **q-value** |
| --- | --- | --- | --- | --- | --- |
| apparently | 0.03 | 0.03 | 0.0 | 0.84 | 0.94 |
| arguably | 0.01 | 0.02 | 0.01 | 0.48 | 0.77 |
| importantly | 0.16 | 0.15 | -0.01 | 0.86 | 0.94 |
| notably | 0.21 | 0.31 | 0.1 | 0.07 | 0.46 |
| presumably | 0.06 | 0.06 | -0.01 | 0.82 | 0.94 |
| seemingly | 0.03 | 0.02 | -0.0 | 0.85 | 0.94 |
| to our knowledge | 0.09 | 0.06 | -0.03 | 0.42 | 0.73 |

**Technical / Statistical**

| **Phrase/Term** | **Prevalence pre (%)** | **Prevalence post (%)** | **Δ Prevalence (%)** | **p-value** | **q-value** |
| --- | --- | --- | --- | --- | --- |
| confidence interval | 0.04 | 0.0 | -0.04 | 0.02 | 0.28 |
| effect size | 0.1 | 0.1 | 0.01 | 0.85 | 0.94 |
| external validity | 0.02 | 0.01 | -0.01 | 0.39 | 0.70 |
| internal validity | 0.0 | 0.0 | 0.0 | — | — |
| reproducibility | 0.09 | 0.05 | -0.04 | 0.18 | 0.59 |
| robust | 0.31 | 0.28 | -0.03 | 0.65 | 0.89 |
| robust baseline | 0.0 | 0.0 | 0.0 | — | — |
| robustly | 0.03 | 0.01 | -0.02 | 0.23 | 0.59 |
| robustness | 0.07 | 0.06 | -0.01 | 0.65 | 0.89 |
| statistically significant | 0.03 | 0.0 | -0.03 | 0.04 | 0.34 |

**Other phrases**

| **Phrase/Term** | **Prevalence pre (%)** | **Prevalence post (%)** | **Δ Prevalence (%)** | **p-value** | **q-value** |
| --- | --- | --- | --- | --- | --- |
| RAG | 0.0 | 0.0 | 0.0 | — | — |
| RAG pipeline | 0.0 | 0.0 | 0.0 | — | — |
| ablation study | 0.0 | 0.0 | 0.0 | — | — |
| advance | 0.02 | 0.02 | 0.0 | 0.86 | 0.94 |
| advanced | 0.47 | 0.43 | -0.04 | 0.50 | 0.79 |
| advances | 0.09 | 0.12 | 0.03 | 0.42 | 0.73 |
| advancing | 0.01 | 0.02 | 0.01 | 0.54 | 0.80 |
| agentic | 0.0 | 0.0 | 0.0 | — | — |
| ameliorate | 0.0 | 0.01 | 0.01 | 0.28 | 0.59 |
| ameliorated | 0.0 | 0.01 | 0.01 | 0.28 | 0.59 |
| ameliorates | 0.0 | 0.0 | 0.0 | — | — |
| amelioration | 0.0 | 0.0 | 0.0 | — | — |
| as evidenced by | 0.02 | 0.02 | 0.0 | 0.86 | 0.94 |
| as such | 0.13 | 0.1 | -0.03 | 0.45 | 0.76 |
| baseline | 0.77 | 0.75 | -0.02 | 0.71 | 0.94 |
| benchmark | 0.06 | 0.02 | -0.03 | 0.19 | 0.59 |
| benchmarking | 0.0 | 0.0 | 0.0 | — | — |
| body of literature | 0.01 | 0.01 | -0.01 | 0.65 | 0.89 |
| catalyze | 0.0 | 0.0 | 0.0 | — | — |
| catalyzed | 0.0 | 0.0 | 0.0 | — | — |
| catalyzes | 0.0 | 0.0 | 0.0 | — | — |
| catalyzing | 0.0 | 0.0 | 0.0 | — | — |
| chain of thought | 0.0 | 0.0 | 0.0 | — | — |
| clinical implications | 0.02 | 0.06 | 0.04 | 0.13 | 0.53 |
| clinically meaningful | 0.08 | 0.09 | 0.01 | 0.73 | 0.94 |
| compelling | 0.03 | 0.02 | -0.01 | 0.51 | 0.80 |
| compelling evidence | 0.01 | 0.02 | 0.0 | 0.89 | 0.94 |
| crucially | 0.01 | 0.01 | 0.0 | 0.92 | 0.94 |
| cumulatively | 0.01 | 0.02 | 0.0 | 0.89 | 0.94 |
| cutting edge | 0.0 | 0.0 | 0.0 | — | — |
| data drift | 0.0 | 0.0 | 0.0 | — | — |
| data driven | 0.01 | 0.0 | -0.01 | 0.19 | 0.59 |
| domain agnostic | 0.0 | 0.0 | 0.0 | — | — |
| domain shift | 0.0 | 0.0 | 0.0 | — | — |
| downstream | 0.01 | 0.05 | 0.03 | 0.10 | 0.49 |
| effectiveness | 0.27 | 0.26 | -0.01 | 0.79 | 0.94 |
| efficacy | 0.04 | 0.01 | -0.03 | 0.08 | 0.49 |
| elucidate | 0.03 | 0.08 | 0.05 | 0.11 | 0.49 |
| elucidated | 0.02 | 0.09 | 0.07 | 0.01 | 0.19 |
| elucidates | 0.0 | 0.0 | 0.0 | — | — |
| elucidation | 0.0 | 0.0 | 0.0 | — | — |
| end to end | 0.0 | 0.0 | 0.0 | — | — |
| error bars | 0.06 | 0.06 | -0.01 | 0.82 | 0.94 |
| evidence based | 0.08 | 0.12 | 0.04 | 0.32 | 0.64 |
| facilitate | 0.1 | 0.11 | 0.01 | 0.83 | 0.94 |
| facilitated | 0.03 | 0.0 | -0.03 | 0.06 | 0.46 |
| facilitates | 0.01 | 0.05 | 0.04 | 0.03 | 0.34 |
| facilitating | 0.03 | 0.01 | -0.02 | 0.23 | 0.59 |
| few shot | 0.0 | 0.0 | 0.0 | — | — |
| fine tune | 0.0 | 0.0 | 0.0 | — | — |
| fine tuned | 0.0 | 0.0 | 0.0 | — | — |
| foundation model | 0.0 | 0.0 | 0.0 | — | — |
| framework | 0.06 | 0.08 | 0.02 | 0.42 | 0.73 |
| future work should | 0.0 | 0.01 | 0.01 | 0.28 | 0.59 |
| generalizability | 0.17 | 0.26 | 0.09 | 0.07 | 0.46 |
| generalizable | 0.1 | 0.14 | 0.04 | 0.32 | 0.64 |
| ground truth | 0.02 | 0.02 | -0.0 | 0.77 | 0.94 |
| groundbreaking | 0.0 | 0.01 | 0.01 | 0.28 | 0.59 |
| growing body of evidence | 0.03 | 0.02 | -0.01 | 0.51 | 0.80 |
| guardrail | 0.0 | 0.0 | 0.0 | — | — |
| guardrails | 0.0 | 0.01 | 0.01 | 0.28 | 0.59 |
| hallucination | 0.0 | 0.0 | 0.0 | — | — |
| hallucinations | 0.0 | 0.0 | 0.0 | — | — |
| harness | 0.01 | 0.01 | 0.0 | 0.92 | 0.94 |
| harnessing | 0.0 | 0.0 | 0.0 | — | — |
| highly significant | 0.0 | 0.0 | 0.0 | — | — |
| holistic | 0.01 | 0.02 | 0.0 | 0.89 | 0.94 |
| holistically | 0.0 | 0.0 | 0.0 | — | — |
| illuminate | 0.0 | 0.0 | 0.0 | — | — |
| illuminated | 0.02 | 0.02 | -0.0 | 0.77 | 0.94 |
| illuminates | 0.0 | 0.0 | 0.0 | — | — |
| illuminating | 0.0 | 0.01 | 0.01 | 0.28 | 0.59 |
| implications for practice | 0.0 | 0.0 | 0.0 | — | — |
| implications for research | 0.0 | 0.0 | 0.0 | — | — |
| in brief | 0.13 | 0.1 | -0.03 | 0.48 | 0.77 |
| in closing | 0.0 | 0.0 | 0.0 | — | — |
| in light of | 0.03 | 0.03 | -0.0 | 0.90 | 0.94 |
| in short | 0.03 | 0.02 | -0.01 | 0.61 | 0.86 |
| in sum | 0.0 | 0.0 | 0.0 | — | — |
| in this context | 0.04 | 0.05 | 0.01 | 0.80 | 0.94 |
| in this paper | 0.0 | 0.0 | 0.0 | — | — |
| in this setting | 0.03 | 0.0 | -0.03 | 0.06 | 0.46 |
| in this study | 0.92 | 1.0 | 0.08 | <0.01 | **0.04** |
| in this work | 0.01 | 0.02 | 0.01 | 0.54 | 0.80 |
| instruction tuned | 0.0 | 0.0 | 0.0 | — | — |
| interestingly | 0.16 | 0.15 | -0.01 | 0.86 | 0.94 |
| key contribution | 0.0 | 0.0 | 0.0 | — | — |
| key takeaway | 0.0 | 0.0 | 0.0 | — | — |
| key takeaways | 0.0 | 0.0 | 0.0 | — | — |
| large language model | 0.0 | 0.0 | 0.0 | — | — |
| leverage | 0.01 | 0.04 | 0.03 | 0.07 | 0.46 |
| leveraged | 0.0 | 0.01 | 0.01 | 0.28 | 0.59 |
| leverages | 0.0 | 0.02 | 0.02 | 0.06 | 0.46 |
| leveraging | 0.0 | 0.07 | 0.07 | <0.01 | **0.04** |
| limitations include | 0.03 | 0.07 | 0.04 | 0.09 | 0.49 |
| major contribution | 0.0 | 0.0 | 0.0 | — | — |
| markedly | 0.04 | 0.07 | 0.03 | 0.28 | 0.59 |
| meaningful improvement | 0.01 | 0.02 | 0.02 | 0.25 | 0.59 |
| meaningfully better | 0.0 | 0.0 | 0.0 | — | — |
| methodological | 0.03 | 0.03 | 0.0 | 0.84 | 0.94 |
| methodology | 0.26 | 0.2 | -0.06 | 0.27 | 0.59 |
| mitigate | 0.06 | 0.17 | 0.11 | <0.01 | 0.06 |
| mitigated | 0.01 | 0.03 | 0.02 | 0.32 | 0.64 |
| mitigates | 0.0 | 0.01 | 0.01 | 0.28 | 0.59 |
| mitigation | 0.01 | 0.01 | -0.01 | 0.65 | 0.89 |
| model agnostic | 0.0 | 0.0 | 0.0 | — | — |
| move the needle | 0.0 | 0.0 | 0.0 | — | — |
| noteworthily | 0.0 | 0.0 | 0.0 | — | — |
| noteworthy | 0.06 | 0.04 | -0.02 | 0.41 | 0.73 |
| novel | 0.28 | 0.35 | 0.07 | 0.24 | 0.59 |
| novel contribution | 0.0 | 0.0 | 0.0 | — | — |
| novelty | 0.01 | 0.02 | 0.01 | 0.48 | 0.77 |
| offers insight | 0.0 | 0.0 | 0.0 | — | — |
| offers insights | 0.0 | 0.0 | 0.0 | — | — |
| opens the door | 0.0 | 0.0 | 0.0 | — | — |
| optimization | 0.06 | 0.02 | -0.04 | 0.09 | 0.49 |
| optimize | 0.1 | 0.06 | -0.03 | 0.32 | 0.64 |
| optimized | 0.07 | 0.02 | -0.05 | 0.03 | 0.34 |
| optimizes | 0.0 | 0.01 | 0.01 | 0.28 | 0.59 |
| optimizing | 0.04 | 0.06 | 0.02 | 0.41 | 0.73 |
| ostensible | 0.0 | 0.0 | 0.0 | — | — |
| ostensibly | 0.0 | 0.0 | 0.0 | — | — |
| our findings | 0.01 | 0.0 | -0.01 | 0.19 | 0.59 |
| paradigm | 0.08 | 0.06 | -0.03 | 0.38 | 0.70 |
| paradigm shift | 0.02 | 0.02 | -0.0 | 0.77 | 0.94 |
| paradigmatic | 0.0 | 0.0 | 0.0 | — | — |
| paves the way | 0.0 | 0.0 | 0.0 | — | — |
| pipeline | 0.01 | 0.01 | 0.0 | 0.92 | 0.94 |
| post train | 0.0 | 0.0 | 0.0 | — | — |
| post trained | 0.0 | 0.0 | 0.0 | — | — |
| practical implications | 0.01 | 0.0 | -0.01 | 0.35 | 0.66 |
| pre trained | 0.0 | 0.0 | 0.0 | — | — |
| pretrain | 0.0 | 0.0 | 0.0 | — | — |
| primary contribution | 0.0 | 0.0 | 0.0 | — | — |
| promising | 0.08 | 0.07 | -0.0 | 0.89 | 0.94 |
| prompt | 0.03 | 0.14 | 0.11 | <0.01 | **0.04** |
| prompting | 0.01 | 0.02 | 0.02 | 0.25 | 0.59 |
| provides insight | 0.0 | 0.01 | 0.01 | 0.28 | 0.59 |
| provides insights | 0.02 | 0.02 | -0.0 | 0.77 | 0.94 |
| purportedly | 0.0 | 0.0 | 0.0 | — | — |
| putative | 0.05 | 0.0 | -0.05 | 0.01 | 0.19 |
| putatively | 0.02 | 0.0 | -0.02 | 0.10 | 0.49 |
| real world | 0.12 | 0.12 | 0.0 | 0.96 | 0.96 |
| real world evidence | 0.0 | 0.01 | 0.01 | 0.28 | 0.59 |
| real world scenario | 0.01 | 0.0 | -0.01 | 0.35 | 0.66 |
| real world setting | 0.01 | 0.01 | 0.0 | 0.92 | 0.94 |
| remarkably | 0.03 | 0.01 | -0.02 | 0.23 | 0.59 |
| reproducible | 0.06 | 0.03 | -0.03 | 0.25 | 0.59 |
| retrieval augmented | 0.0 | 0.0 | 0.0 | — | — |
| scalability | 0.0 | 0.0 | 0.0 | — | — |
| scalable | 0.02 | 0.02 | -0.0 | 0.77 | 0.94 |
| self reflection | 0.0 | 0.0 | 0.0 | — | — |
| sensitivity analysis | 0.16 | 0.19 | 0.02 | 0.59 | 0.86 |
| shed light on | 0.01 | 0.02 | 0.02 | 0.25 | 0.59 |
| sheds light on | 0.0 | 0.0 | 0.0 | — | — |
| significant decrease | 0.01 | 0.0 | -0.01 | 0.35 | 0.66 |
| significant improvement | 0.0 | 0.0 | 0.0 | — | — |
| significant increase | 0.0 | 0.0 | 0.0 | — | — |
| significantly | 0.08 | 0.0 | -0.08 | <0.01 | 0.05 |
| state of the art | 0.03 | 0.01 | -0.02 | 0.23 | 0.59 |
| strengths include | 0.01 | 0.02 | 0.02 | 0.25 | 0.59 |
| substantially | 0.14 | 0.21 | 0.07 | 0.13 | 0.53 |
| taken together | 0.07 | 0.02 | -0.05 | 0.03 | 0.34 |
| taken together these findings | 0.0 | 0.0 | 0.0 | — | — |
| tentative | 0.0 | 0.0 | 0.0 | — | — |
| tentatively | 0.0 | 0.0 | 0.0 | — | — |
| the current study | 0.31 | 0.21 | -0.11 | 0.05 | 0.46 |
| the present study | 0.27 | 0.31 | 0.03 | 0.54 | 0.80 |
| these findings | 0.02 | 0.0 | -0.02 | 0.10 | 0.49 |
| this investigation | 0.04 | 0.05 | 0.01 | 0.80 | 0.94 |
| this research | 0.35 | 0.37 | 0.02 | 0.72 | 0.94 |
| this study demonstrates | 0.01 | 0.01 | -0.01 | 0.65 | 0.89 |
| this study shows | 0.02 | 0.0 | -0.02 | 0.10 | 0.49 |
| threats to validity | 0.0 | 0.0 | 0.0 | — | — |
| to conclude | 0.02 | 0.0 | -0.02 | 0.10 | 0.49 |
| to summarize | 0.03 | 0.04 | 0.01 | 0.58 | 0.84 |
| to the best of our knowledge | 0.06 | 0.05 | -0.01 | 0.78 | 0.94 |
| transformative | 0.0 | 0.0 | 0.0 | — | — |
| underscore | 0.0 | 0.06 | 0.06 | <0.01 | 0.05 |
| underscored | 0.01 | 0.02 | 0.01 | 0.48 | 0.77 |
| underscores | 0.02 | 0.1 | 0.08 | <0.01 | 0.13 |
| underscoring | 0.01 | 0.02 | 0.02 | 0.25 | 0.59 |
| upstream | 0.01 | 0.03 | 0.03 | 0.13 | 0.53 |
| warrants further investigation | 0.0 | 0.02 | 0.02 | 0.13 | 0.53 |
| we demonstrate | 0.01 | 0.0 | -0.01 | 0.35 | 0.66 |
| we elucidate | 0.0 | 0.0 | 0.0 | — | — |
| we highlight | 0.0 | 0.0 | 0.0 | — | — |
| we provide evidence | 0.0 | 0.01 | 0.01 | 0.28 | 0.59 |
| we show that | 0.01 | 0.02 | 0.0 | 0.89 | 0.94 |
| we underscore | 0.0 | 0.0 | 0.0 | — | — |
| with respect to | 0.19 | 0.13 | -0.06 | 0.19 | 0.59 |
| workflow | 0.0 | 0.0 | 0.0 | — | — |
| zero shot | 0.0 | 0.0 | 0.0 | — | — |

**Q2**

**Connectors / Transitions**

| **Phrase/Term** | **Prevalence pre (%)** | **Prevalence post (%)** | **Δ Prevalence (%)** | **p-value** | **q-value** |
| --- | --- | --- | --- | --- | --- |
| accordingly | 0.1 | 0.13 | 0.03 | 0.55 | 0.76 |
| collectively | 0.01 | 0.03 | 0.02 | 0.24 | 0.61 |
| collectively our results | 0.0 | 0.0 | 0.0 | — | — |
| consequently | 0.1 | 0.17 | 0.07 | 0.15 | 0.61 |
| furthermore | 0.55 | 0.57 | 0.02 | 0.74 | 0.89 |
| hence | 0.17 | 0.12 | -0.05 | 0.33 | 0.61 |
| in conclusion | 0.45 | 0.43 | -0.02 | 0.74 | 0.89 |
| in summary | 0.19 | 0.14 | -0.05 | 0.30 | 0.61 |
| moreover | 0.44 | 0.48 | 0.04 | 0.58 | 0.76 |
| nevertheless | 0.27 | 0.22 | -0.05 | 0.38 | 0.64 |
| nonetheless | 0.06 | 0.11 | 0.04 | 0.28 | 0.61 |
| notwithstanding | 0.01 | 0.0 | -0.01 | 0.35 | 0.61 |
| therefore | 0.69 | 0.68 | -0.02 | 0.80 | 0.92 |

**Interpretive / Hedging**

| **Phrase/Term** | **Prevalence pre (%)** | **Prevalence post (%)** | **Δ Prevalence (%)** | **p-value** | **q-value** |
| --- | --- | --- | --- | --- | --- |
| apparently | 0.04 | 0.01 | -0.03 | 0.23 | 0.61 |
| arguably | 0.01 | 0.0 | -0.01 | 0.35 | 0.61 |
| importantly | 0.09 | 0.13 | 0.04 | 0.41 | 0.66 |
| notably | 0.11 | 0.22 | 0.1 | 0.04 | 0.50 |
| presumably | 0.08 | 0.1 | 0.01 | 0.74 | 0.89 |
| seemingly | 0.02 | 0.01 | -0.01 | 0.65 | 0.82 |
| to our knowledge | 0.13 | 0.17 | 0.04 | 0.40 | 0.65 |

**Technical / Statistical**

| **Phrase/Term** | **Prevalence pre (%)** | **Prevalence post (%)** | **Δ Prevalence (%)** | **p-value** | **q-value** |
| --- | --- | --- | --- | --- | --- |
| confidence interval | 0.19 | 0.14 | -0.05 | 0.39 | 0.64 |
| effect size | 0.06 | 0.08 | 0.02 | 0.57 | 0.76 |
| external validity | 0.0 | 0.03 | 0.03 | 0.06 | 0.50 |
| internal validity | 0.0 | 0.0 | 0.0 | — | — |
| reproducibility | 0.09 | 0.1 | 0.0 | 0.92 | 0.93 |
| robust | 0.07 | 0.13 | 0.05 | 0.19 | 0.61 |
| robust baseline | 0.0 | 0.0 | 0.0 | — | — |
| robustly | 0.01 | 0.02 | 0.01 | 0.48 | 0.71 |
| robustness | 0.0 | 0.06 | 0.06 | <0.01 | 0.50 |
| statistically significant | 0.66 | 0.6 | -0.06 | 0.42 | 0.66 |

**Other phrases**

| **Phrase/Term** | **Prevalence pre (%)** | **Prevalence post (%)** | **Δ Prevalence (%)** | **p-value** | **q-value** |
| --- | --- | --- | --- | --- | --- |
| RAG | 0.0 | 0.01 | 0.01 | 0.28 | 0.61 |
| RAG pipeline | 0.0 | 0.0 | 0.0 | — | — |
| ablation study | 0.0 | 0.0 | 0.0 | — | — |
| advance | 0.04 | 0.04 | 0.01 | 0.83 | 0.93 |
| advanced | 0.27 | 0.4 | 0.13 | 0.05 | 0.50 |
| advances | 0.09 | 0.12 | 0.03 | 0.55 | 0.76 |
| advancing | 0.02 | 0.02 | 0.0 | 0.88 | 0.93 |
| agentic | 0.0 | 0.0 | 0.0 | — | — |
| ameliorate | 0.0 | 0.0 | 0.0 | — | — |
| ameliorated | 0.01 | 0.0 | -0.01 | 0.35 | 0.61 |
| ameliorates | 0.02 | 0.0 | -0.02 | 0.19 | 0.61 |
| amelioration | 0.01 | 0.0 | -0.01 | 0.35 | 0.61 |
| as evidenced by | 0.03 | 0.02 | -0.01 | 0.78 | 0.91 |
| as such | 0.05 | 0.12 | 0.07 | 0.06 | 0.50 |
| baseline | 0.5 | 0.58 | 0.08 | 0.25 | 0.61 |
| benchmark | 0.0 | 0.02 | 0.02 | 0.13 | 0.61 |
| benchmarking | 0.0 | 0.0 | 0.0 | — | — |
| body of literature | 0.01 | 0.0 | -0.01 | 0.35 | 0.61 |
| catalyze | 0.0 | 0.0 | 0.0 | — | — |
| catalyzed | 0.0 | 0.0 | 0.0 | — | — |
| catalyzes | 0.0 | 0.0 | 0.0 | — | — |
| catalyzing | 0.0 | 0.0 | 0.0 | — | — |
| chain of thought | 0.0 | 0.0 | 0.0 | — | — |
| clinical implications | 0.04 | 0.05 | 0.02 | 0.57 | 0.76 |
| clinically meaningful | 0.01 | 0.03 | 0.02 | 0.24 | 0.61 |
| compelling | 0.01 | 0.0 | -0.01 | 0.35 | 0.61 |
| compelling evidence | 0.0 | 0.0 | 0.0 | — | — |
| crucially | 0.0 | 0.0 | 0.0 | — | — |
| cumulatively | 0.01 | 0.01 | 0.0 | 0.92 | 0.93 |
| cutting edge | 0.0 | 0.0 | 0.0 | — | — |
| data drift | 0.0 | 0.0 | 0.0 | — | — |
| data driven | 0.0 | 0.0 | 0.0 | — | — |
| domain agnostic | 0.0 | 0.0 | 0.0 | — | — |
| domain shift | 0.0 | 0.0 | 0.0 | — | — |
| downstream | 0.03 | 0.02 | -0.01 | 0.78 | 0.91 |
| effectiveness | 0.18 | 0.29 | 0.11 | 0.05 | 0.50 |
| efficacy | 0.44 | 0.37 | -0.08 | 0.26 | 0.61 |
| elucidate | 0.07 | 0.06 | -0.01 | 0.79 | 0.92 |
| elucidated | 0.05 | 0.06 | 0.02 | 0.57 | 0.76 |
| elucidates | 0.0 | 0.0 | 0.0 | — | — |
| elucidation | 0.0 | 0.0 | 0.0 | — | — |
| end to end | 0.0 | 0.0 | 0.0 | — | — |
| error bars | 0.05 | 0.03 | -0.01 | 0.61 | 0.79 |
| evidence based | 0.07 | 0.12 | 0.04 | 0.29 | 0.61 |
| facilitate | 0.05 | 0.11 | 0.06 | 0.10 | 0.61 |
| facilitated | 0.01 | 0.02 | 0.01 | 0.48 | 0.71 |
| facilitates | 0.04 | 0.03 | -0.0 | 0.85 | 0.93 |
| facilitating | 0.01 | 0.04 | 0.03 | 0.13 | 0.61 |
| few shot | 0.0 | 0.0 | 0.0 | — | — |
| fine tune | 0.01 | 0.01 | 0.0 | 0.92 | 0.93 |
| fine tuned | 0.0 | 0.0 | 0.0 | — | — |
| foundation model | 0.0 | 0.0 | 0.0 | — | — |
| framework | 0.02 | 0.05 | 0.04 | 0.17 | 0.61 |
| future work should | 0.0 | 0.0 | 0.0 | — | — |
| generalizability | 0.0 | 0.03 | 0.03 | 0.06 | 0.50 |
| generalizable | 0.02 | 0.03 | 0.01 | 0.53 | 0.75 |
| ground truth | 0.0 | 0.02 | 0.02 | 0.13 | 0.61 |
| groundbreaking | 0.0 | 0.0 | 0.0 | — | — |
| growing body of evidence | 0.01 | 0.01 | 0.0 | 0.92 | 0.93 |
| guardrail | 0.0 | 0.0 | 0.0 | — | — |
| guardrails | 0.0 | 0.0 | 0.0 | — | — |
| hallucination | 0.0 | 0.0 | 0.0 | — | — |
| hallucinations | 0.0 | 0.01 | 0.01 | 0.28 | 0.61 |
| harness | 0.0 | 0.0 | 0.0 | — | — |
| harnessing | 0.01 | 0.0 | -0.01 | 0.35 | 0.61 |
| highly significant | 0.05 | 0.03 | -0.01 | 0.61 | 0.79 |
| holistic | 0.0 | 0.01 | 0.01 | 0.28 | 0.61 |
| holistically | 0.0 | 0.0 | 0.0 | — | — |
| illuminate | 0.0 | 0.0 | 0.0 | — | — |
| illuminated | 0.02 | 0.02 | 0.0 | 0.88 | 0.93 |
| illuminates | 0.0 | 0.0 | 0.0 | — | — |
| illuminating | 0.01 | 0.01 | 0.0 | 0.92 | 0.93 |
| implications for practice | 0.0 | 0.0 | 0.0 | — | — |
| implications for research | 0.0 | 0.0 | 0.0 | — | — |
| in brief | 0.03 | 0.03 | 0.0 | 0.85 | 0.93 |
| in closing | 0.0 | 0.0 | 0.0 | — | — |
| in light of | 0.03 | 0.05 | 0.03 | 0.35 | 0.61 |
| in short | 0.06 | 0.04 | -0.01 | 0.68 | 0.84 |
| in sum | 0.0 | 0.0 | 0.0 | — | — |
| in this context | 0.02 | 0.03 | 0.01 | 0.53 | 0.75 |
| in this paper | 0.01 | 0.03 | 0.02 | 0.24 | 0.61 |
| in this setting | 0.01 | 0.0 | -0.01 | 0.35 | 0.61 |
| in this study | 0.68 | 0.68 | 0.0 | 0.98 | 0.98 |
| in this work | 0.01 | 0.03 | 0.02 | 0.24 | 0.61 |
| instruction tuned | 0.0 | 0.0 | 0.0 | — | — |
| interestingly | 0.27 | 0.18 | -0.09 | 0.15 | 0.61 |
| key contribution | 0.0 | 0.0 | 0.0 | — | — |
| key takeaway | 0.0 | 0.0 | 0.0 | — | — |
| key takeaways | 0.0 | 0.0 | 0.0 | — | — |
| large language model | 0.0 | 0.0 | 0.0 | — | — |
| leverage | 0.0 | 0.01 | 0.01 | 0.28 | 0.61 |
| leveraged | 0.0 | 0.0 | 0.0 | — | — |
| leverages | 0.0 | 0.0 | 0.0 | — | — |
| leveraging | 0.0 | 0.0 | 0.0 | — | — |
| limitations include | 0.02 | 0.01 | -0.01 | 0.65 | 0.82 |
| major contribution | 0.0 | 0.01 | 0.01 | 0.28 | 0.61 |
| markedly | 0.1 | 0.08 | -0.03 | 0.51 | 0.74 |
| meaningful improvement | 0.0 | 0.0 | 0.0 | — | — |
| meaningfully better | 0.0 | 0.0 | 0.0 | — | — |
| methodological | 0.01 | 0.02 | 0.01 | 0.48 | 0.71 |
| methodology | 0.05 | 0.14 | 0.09 | 0.02 | 0.50 |
| mitigate | 0.01 | 0.06 | 0.06 | 0.03 | 0.50 |
| mitigated | 0.0 | 0.01 | 0.01 | 0.28 | 0.61 |
| mitigates | 0.01 | 0.0 | -0.01 | 0.35 | 0.61 |
| mitigation | 0.0 | 0.0 | 0.0 | — | — |
| model agnostic | 0.0 | 0.0 | 0.0 | — | — |
| move the needle | 0.0 | 0.0 | 0.0 | — | — |
| noteworthily | 0.0 | 0.0 | 0.0 | — | — |
| noteworthy | 0.04 | 0.06 | 0.03 | 0.37 | 0.63 |
| novel | 0.3 | 0.4 | 0.1 | 0.13 | 0.61 |
| novel contribution | 0.0 | 0.0 | 0.0 | — | — |
| novelty | 0.0 | 0.0 | 0.0 | — | — |
| offers insight | 0.0 | 0.0 | 0.0 | — | — |
| offers insights | 0.0 | 0.0 | 0.0 | — | — |
| opens the door | 0.0 | 0.0 | 0.0 | — | — |
| optimization | 0.0 | 0.04 | 0.04 | 0.03 | 0.50 |
| optimize | 0.04 | 0.03 | -0.0 | 0.85 | 0.93 |
| optimized | 0.06 | 0.02 | -0.03 | 0.22 | 0.61 |
| optimizes | 0.0 | 0.0 | 0.0 | — | — |
| optimizing | 0.04 | 0.04 | 0.01 | 0.83 | 0.93 |
| ostensible | 0.0 | 0.0 | 0.0 | — | — |
| ostensibly | 0.0 | 0.0 | 0.0 | — | — |
| our findings | 0.25 | 0.31 | 0.06 | 0.33 | 0.61 |
| paradigm | 0.03 | 0.03 | 0.0 | 0.85 | 0.93 |
| paradigm shift | 0.0 | 0.01 | 0.01 | 0.28 | 0.61 |
| paradigmatic | 0.0 | 0.0 | 0.0 | — | — |
| paves the way | 0.0 | 0.0 | 0.0 | — | — |
| pipeline | 0.0 | 0.03 | 0.03 | 0.06 | 0.50 |
| post train | 0.0 | 0.0 | 0.0 | — | — |
| post trained | 0.0 | 0.0 | 0.0 | — | — |
| practical implications | 0.0 | 0.0 | 0.0 | — | — |
| pre trained | 0.0 | 0.0 | 0.0 | — | — |
| pretrain | 0.0 | 0.0 | 0.0 | — | — |
| primary contribution | 0.0 | 0.0 | 0.0 | — | — |
| promising | 0.08 | 0.13 | 0.05 | 0.29 | 0.61 |
| prompt | 0.04 | 0.01 | -0.03 | 0.23 | 0.61 |
| prompting | 0.0 | 0.0 | 0.0 | — | — |
| provides insight | 0.0 | 0.01 | 0.01 | 0.28 | 0.61 |
| provides insights | 0.0 | 0.01 | 0.01 | 0.28 | 0.61 |
| purportedly | 0.0 | 0.0 | 0.0 | — | — |
| putative | 0.01 | 0.0 | -0.01 | 0.35 | 0.61 |
| putatively | 0.0 | 0.0 | 0.0 | — | — |
| real world | 0.1 | 0.1 | -0.01 | 0.90 | 0.93 |
| real world evidence | 0.0 | 0.01 | 0.01 | 0.28 | 0.61 |
| real world scenario | 0.0 | 0.0 | 0.0 | — | — |
| real world setting | 0.02 | 0.01 | -0.01 | 0.65 | 0.82 |
| remarkably | 0.04 | 0.02 | -0.02 | 0.52 | 0.74 |
| reproducible | 0.04 | 0.02 | -0.02 | 0.52 | 0.74 |
| retrieval augmented | 0.0 | 0.0 | 0.0 | — | — |
| scalability | 0.0 | 0.0 | 0.0 | — | — |
| scalable | 0.0 | 0.0 | 0.0 | — | — |
| self reflection | 0.0 | 0.0 | 0.0 | — | — |
| sensitivity analysis | 0.01 | 0.02 | 0.01 | 0.48 | 0.71 |
| shed light on | 0.0 | 0.01 | 0.01 | 0.28 | 0.61 |
| sheds light on | 0.0 | 0.0 | 0.0 | — | — |
| significant decrease | 0.09 | 0.08 | -0.02 | 0.66 | 0.82 |
| significant improvement | 0.09 | 0.05 | -0.04 | 0.30 | 0.61 |
| significant increase | 0.11 | 0.11 | -0.0 | 0.94 | 0.94 |
| significantly | 0.88 | 0.82 | -0.06 | 0.22 | 0.61 |
| state of the art | 0.0 | 0.01 | 0.01 | 0.28 | 0.61 |
| strengths include | 0.0 | 0.0 | 0.0 | — | — |
| substantially | 0.06 | 0.04 | -0.02 | 0.50 | 0.74 |
| taken together | 0.06 | 0.01 | -0.04 | 0.08 | 0.61 |
| taken together these findings | 0.0 | 0.0 | 0.0 | — | — |
| tentative | 0.0 | 0.0 | 0.0 | — | — |
| tentatively | 0.0 | 0.0 | 0.0 | — | — |
| the current study | 0.27 | 0.2 | -0.06 | 0.29 | 0.61 |
| the present study | 0.42 | 0.31 | -0.1 | 0.12 | 0.61 |
| these findings | 0.26 | 0.32 | 0.06 | 0.32 | 0.61 |
| this investigation | 0.0 | 0.03 | 0.03 | 0.06 | 0.50 |
| this research | 0.26 | 0.39 | 0.13 | 0.05 | 0.50 |
| this study demonstrates | 0.0 | 0.02 | 0.02 | 0.13 | 0.61 |
| this study shows | 0.01 | 0.04 | 0.03 | 0.13 | 0.61 |
| threats to validity | 0.0 | 0.0 | 0.0 | — | — |
| to conclude | 0.05 | 0.04 | -0.0 | 0.91 | 0.93 |
| to summarize | 0.03 | 0.03 | 0.0 | 0.85 | 0.93 |
| to the best of our knowledge | 0.1 | 0.17 | 0.07 | 0.15 | 0.61 |
| transformative | 0.0 | 0.0 | 0.0 | — | — |
| underscore | 0.0 | 0.02 | 0.02 | 0.13 | 0.61 |
| underscored | 0.0 | 0.02 | 0.02 | 0.13 | 0.61 |
| underscores | 0.01 | 0.08 | 0.07 | 0.02 | 0.50 |
| underscoring | 0.0 | 0.04 | 0.04 | 0.03 | 0.50 |
| upstream | 0.0 | 0.0 | 0.0 | — | — |
| warrants further investigation | 0.0 | 0.01 | 0.01 | 0.28 | 0.61 |
| we demonstrate | 0.01 | 0.02 | 0.01 | 0.48 | 0.71 |
| we elucidate | 0.0 | 0.0 | 0.0 | — | — |
| we highlight | 0.0 | 0.0 | 0.0 | — | — |
| we provide evidence | 0.0 | 0.0 | 0.0 | — | — |
| we show that | 0.03 | 0.01 | -0.02 | 0.39 | 0.64 |
| we underscore | 0.0 | 0.0 | 0.0 | — | — |
| with respect to | 0.21 | 0.11 | -0.11 | 0.04 | 0.50 |
| workflow | 0.0 | 0.02 | 0.02 | 0.13 | 0.61 |
| zero shot | 0.0 | 0.0 | 0.0 | — | — |

**Q3**

**Connectors / Transitions**

| **Phrase/Term** | **Prevalence pre (%)** | **Prevalence post (%)** | **Δ Prevalence (%)** | **p-value** | **q-value** |
| --- | --- | --- | --- | --- | --- |
| accordingly | 0.08 | 0.05 | -0.03 | 0.41 | 0.59 |
| collectively | 0.01 | 0.02 | 0.01 | 0.48 | 0.63 |
| collectively our results | 0.0 | 0.0 | 0.0 | — | — |
| consequently | 0.13 | 0.2 | 0.07 | 0.15 | 0.52 |
| furthermore | 0.38 | 0.51 | 0.13 | 0.07 | 0.38 |
| hence | 0.14 | 0.22 | 0.08 | 0.16 | 0.52 |
| in conclusion | 0.23 | 0.4 | 0.17 | 0.01 | 0.16 |
| in summary | 0.18 | 0.18 | 0.01 | 0.90 | 0.92 |
| moreover | 0.32 | 0.39 | 0.06 | 0.35 | 0.52 |
| nevertheless | 0.15 | 0.18 | 0.03 | 0.51 | 0.66 |
| nonetheless | 0.02 | 0.08 | 0.06 | 0.05 | 0.36 |
| notwithstanding | 0.0 | 0.0 | 0.0 | — | — |
| therefore | 0.7 | 0.84 | 0.14 | 0.02 | 0.25 |

**Interpretive / Hedging**

| **Phrase/Term** | **Prevalence pre (%)** | **Prevalence post (%)** | **Δ Prevalence (%)** | **p-value** | **q-value** |
| --- | --- | --- | --- | --- | --- |
| apparently | 0.0 | 0.0 | 0.0 | — | — |
| arguably | 0.0 | 0.0 | 0.0 | — | — |
| importantly | 0.09 | 0.08 | -0.02 | 0.66 | 0.77 |
| notably | 0.06 | 0.18 | 0.13 | <0.01 | 0.13 |
| presumably | 0.01 | 0.0 | -0.01 | 0.35 | 0.52 |
| seemingly | 0.0 | 0.01 | 0.01 | 0.28 | 0.52 |
| to our knowledge | 0.16 | 0.11 | -0.05 | 0.30 | 0.52 |

**Technical / Statistical**

| **Phrase/Term** | **Prevalence pre (%)** | **Prevalence post (%)** | **Δ Prevalence (%)** | **p-value** | **q-value** |
| --- | --- | --- | --- | --- | --- |
| confidence interval | 0.3 | 0.23 | -0.07 | 0.26 | 0.52 |
| effect size | 0.02 | 0.06 | 0.05 | 0.10 | 0.44 |
| external validity | 0.01 | 0.0 | -0.01 | 0.35 | 0.52 |
| internal validity | 0.0 | 0.0 | 0.0 | — | — |
| reproducibility | 0.07 | 0.13 | 0.05 | 0.19 | 0.52 |
| robust | 0.02 | 0.14 | 0.12 | <0.01 | 0.07 |
| robust baseline | 0.0 | 0.0 | 0.0 | — | — |
| robustly | 0.0 | 0.0 | 0.0 | — | — |
| robustness | 0.01 | 0.02 | 0.01 | 0.48 | 0.63 |
| statistically significant | 0.72 | 0.62 | -0.1 | 0.14 | 0.49 |

**Other phrases**

| **Phrase/Term** | **Prevalence pre (%)** | **Prevalence post (%)** | **Δ Prevalence (%)** | **p-value** | **q-value** |
| --- | --- | --- | --- | --- | --- |
| RAG | 0.0 | 0.0 | 0.0 | — | — |
| RAG pipeline | 0.0 | 0.0 | 0.0 | — | — |
| ablation study | 0.0 | 0.0 | 0.0 | — | — |
| advance | 0.0 | 0.08 | 0.08 | <0.01 | 0.13 |
| advanced | 0.2 | 0.38 | 0.17 | <0.01 | 0.15 |
| advances | 0.04 | 0.15 | 0.11 | <0.01 | 0.13 |
| advancing | 0.0 | 0.02 | 0.02 | 0.13 | 0.47 |
| agentic | 0.0 | 0.0 | 0.0 | — | — |
| ameliorate | 0.01 | 0.02 | 0.01 | 0.48 | 0.63 |
| ameliorated | 0.01 | 0.01 | 0.0 | 0.92 | 0.92 |
| ameliorates | 0.01 | 0.0 | -0.01 | 0.35 | 0.52 |
| amelioration | 0.01 | 0.0 | -0.01 | 0.35 | 0.52 |
| as evidenced by | 0.0 | 0.03 | 0.03 | 0.06 | 0.36 |
| as such | 0.06 | 0.04 | -0.02 | 0.50 | 0.65 |
| baseline | 0.39 | 0.53 | 0.14 | 0.05 | 0.36 |
| benchmark | 0.02 | 0.01 | -0.01 | 0.65 | 0.76 |
| benchmarking | 0.0 | 0.0 | 0.0 | — | — |
| body of literature | 0.0 | 0.0 | 0.0 | — | — |
| catalyze | 0.0 | 0.01 | 0.01 | 0.28 | 0.52 |
| catalyzed | 0.0 | 0.0 | 0.0 | — | — |
| catalyzes | 0.0 | 0.0 | 0.0 | — | — |
| catalyzing | 0.0 | 0.01 | 0.01 | 0.28 | 0.52 |
| chain of thought | 0.0 | 0.0 | 0.0 | — | — |
| clinical implications | 0.01 | 0.0 | -0.01 | 0.35 | 0.52 |
| clinically meaningful | 0.01 | 0.01 | 0.0 | 0.92 | 0.92 |
| compelling | 0.0 | 0.0 | 0.0 | — | — |
| compelling evidence | 0.0 | 0.0 | 0.0 | — | — |
| crucially | 0.0 | 0.01 | 0.01 | 0.28 | 0.52 |
| cumulatively | 0.0 | 0.0 | 0.0 | — | — |
| cutting edge | 0.0 | 0.02 | 0.02 | 0.13 | 0.47 |
| data drift | 0.0 | 0.0 | 0.0 | — | — |
| data driven | 0.0 | 0.0 | 0.0 | — | — |
| domain agnostic | 0.0 | 0.0 | 0.0 | — | — |
| domain shift | 0.0 | 0.0 | 0.0 | — | — |
| downstream | 0.01 | 0.09 | 0.08 | <0.01 | 0.16 |
| effectiveness | 0.19 | 0.28 | 0.09 | 0.16 | 0.52 |
| efficacy | 0.36 | 0.44 | 0.08 | 0.25 | 0.52 |
| elucidate | 0.06 | 0.1 | 0.04 | 0.27 | 0.52 |
| elucidated | 0.05 | 0.03 | -0.01 | 0.61 | 0.75 |
| elucidates | 0.0 | 0.0 | 0.0 | — | — |
| elucidation | 0.0 | 0.01 | 0.01 | 0.28 | 0.52 |
| end to end | 0.0 | 0.01 | 0.01 | 0.28 | 0.52 |
| error bars | 0.02 | 0.02 | 0.0 | 0.88 | 0.92 |
| evidence based | 0.06 | 0.08 | 0.02 | 0.57 | 0.72 |
| facilitate | 0.07 | 0.08 | 0.0 | 0.97 | 0.97 |
| facilitated | 0.03 | 0.02 | -0.01 | 0.78 | 0.86 |
| facilitates | 0.04 | 0.1 | 0.06 | 0.09 | 0.43 |
| facilitating | 0.04 | 0.03 | -0.0 | 0.85 | 0.92 |
| few shot | 0.0 | 0.0 | 0.0 | — | — |
| fine tune | 0.0 | 0.0 | 0.0 | — | — |
| fine tuned | 0.0 | 0.01 | 0.01 | 0.28 | 0.52 |
| foundation model | 0.0 | 0.0 | 0.0 | — | — |
| framework | 0.01 | 0.05 | 0.04 | 0.06 | 0.36 |
| future work should | 0.0 | 0.0 | 0.0 | — | — |
| generalizability | 0.01 | 0.05 | 0.04 | 0.06 | 0.36 |
| generalizable | 0.0 | 0.02 | 0.02 | 0.13 | 0.47 |
| ground truth | 0.0 | 0.01 | 0.01 | 0.28 | 0.52 |
| groundbreaking | 0.0 | 0.0 | 0.0 | — | — |
| growing body of evidence | 0.0 | 0.0 | 0.0 | — | — |
| guardrail | 0.0 | 0.0 | 0.0 | — | — |
| guardrails | 0.0 | 0.0 | 0.0 | — | — |
| hallucination | 0.0 | 0.0 | 0.0 | — | — |
| hallucinations | 0.0 | 0.0 | 0.0 | — | — |
| harness | 0.0 | 0.0 | 0.0 | — | — |
| harnessing | 0.0 | 0.0 | 0.0 | — | — |
| highly significant | 0.01 | 0.02 | 0.01 | 0.48 | 0.63 |
| holistic | 0.0 | 0.0 | 0.0 | — | — |
| holistically | 0.0 | 0.0 | 0.0 | — | — |
| illuminate | 0.01 | 0.02 | 0.01 | 0.48 | 0.63 |
| illuminated | 0.03 | 0.02 | -0.01 | 0.78 | 0.86 |
| illuminates | 0.0 | 0.0 | 0.0 | — | — |
| illuminating | 0.0 | 0.01 | 0.01 | 0.28 | 0.52 |
| implications for practice | 0.01 | 0.01 | 0.0 | 0.92 | 0.92 |
| implications for research | 0.01 | 0.0 | -0.01 | 0.35 | 0.52 |
| in brief | 0.02 | 0.04 | 0.02 | 0.31 | 0.52 |
| in closing | 0.0 | 0.0 | 0.0 | — | — |
| in light of | 0.01 | 0.0 | -0.01 | 0.35 | 0.52 |
| in short | 0.05 | 0.02 | -0.02 | 0.34 | 0.52 |
| in sum | 0.0 | 0.0 | 0.0 | — | — |
| in this context | 0.01 | 0.01 | 0.0 | 0.92 | 0.92 |
| in this paper | 0.03 | 0.02 | -0.01 | 0.78 | 0.86 |
| in this setting | 0.0 | 0.0 | 0.0 | — | — |
| in this study | 0.74 | 0.78 | 0.04 | 0.46 | 0.63 |
| in this work | 0.02 | 0.02 | 0.0 | 0.88 | 0.92 |
| instruction tuned | 0.0 | 0.0 | 0.0 | — | — |
| interestingly | 0.12 | 0.15 | 0.03 | 0.53 | 0.68 |
| key contribution | 0.0 | 0.0 | 0.0 | — | — |
| key takeaway | 0.0 | 0.0 | 0.0 | — | — |
| key takeaways | 0.0 | 0.0 | 0.0 | — | — |
| large language model | 0.0 | 0.0 | 0.0 | — | — |
| leverage | 0.0 | 0.0 | 0.0 | — | — |
| leveraged | 0.0 | 0.0 | 0.0 | — | — |
| leverages | 0.0 | 0.0 | 0.0 | — | — |
| leveraging | 0.0 | 0.0 | 0.0 | — | — |
| limitations include | 0.02 | 0.01 | -0.01 | 0.65 | 0.76 |
| major contribution | 0.0 | 0.0 | 0.0 | — | — |
| markedly | 0.03 | 0.09 | 0.06 | 0.07 | 0.38 |
| meaningful improvement | 0.0 | 0.0 | 0.0 | — | — |
| meaningfully better | 0.0 | 0.0 | 0.0 | — | — |
| methodological | 0.02 | 0.04 | 0.02 | 0.31 | 0.52 |
| methodology | 0.11 | 0.16 | 0.05 | 0.30 | 0.52 |
| mitigate | 0.0 | 0.12 | 0.12 | <0.01 | **0.03** |
| mitigated | 0.01 | 0.01 | 0.0 | 0.92 | 0.92 |
| mitigates | 0.0 | 0.03 | 0.03 | 0.06 | 0.36 |
| mitigation | 0.0 | 0.03 | 0.03 | 0.06 | 0.36 |
| model agnostic | 0.0 | 0.0 | 0.0 | — | — |
| move the needle | 0.0 | 0.0 | 0.0 | — | — |
| noteworthily | 0.0 | 0.0 | 0.0 | — | — |
| noteworthy | 0.03 | 0.06 | 0.04 | 0.21 | 0.52 |
| novel | 0.29 | 0.34 | 0.06 | 0.38 | 0.56 |
| novel contribution | 0.0 | 0.0 | 0.0 | — | — |
| novelty | 0.0 | 0.01 | 0.01 | 0.28 | 0.52 |
| offers insight | 0.0 | 0.0 | 0.0 | — | — |
| offers insights | 0.0 | 0.0 | 0.0 | — | — |
| opens the door | 0.0 | 0.0 | 0.0 | — | — |
| optimization | 0.02 | 0.06 | 0.05 | 0.10 | 0.44 |
| optimize | 0.02 | 0.04 | 0.02 | 0.31 | 0.52 |
| optimized | 0.05 | 0.03 | -0.01 | 0.61 | 0.75 |
| optimizes | 0.0 | 0.02 | 0.02 | 0.13 | 0.47 |
| optimizing | 0.0 | 0.04 | 0.04 | 0.03 | 0.28 |
| ostensible | 0.0 | 0.0 | 0.0 | — | — |
| ostensibly | 0.0 | 0.0 | 0.0 | — | — |
| our findings | 0.19 | 0.31 | 0.13 | 0.04 | 0.33 |
| paradigm | 0.02 | 0.04 | 0.02 | 0.31 | 0.52 |
| paradigm shift | 0.01 | 0.0 | -0.01 | 0.35 | 0.52 |
| paradigmatic | 0.0 | 0.0 | 0.0 | — | — |
| paves the way | 0.0 | 0.0 | 0.0 | — | — |
| pipeline | 0.0 | 0.01 | 0.01 | 0.28 | 0.52 |
| post train | 0.0 | 0.0 | 0.0 | — | — |
| post trained | 0.0 | 0.0 | 0.0 | — | — |
| practical implications | 0.0 | 0.0 | 0.0 | — | — |
| pre trained | 0.0 | 0.0 | 0.0 | — | — |
| pretrain | 0.0 | 0.0 | 0.0 | — | — |
| primary contribution | 0.0 | 0.0 | 0.0 | — | — |
| promising | 0.07 | 0.12 | 0.04 | 0.29 | 0.52 |
| prompt | 0.05 | 0.08 | 0.03 | 0.39 | 0.56 |
| prompting | 0.01 | 0.0 | -0.01 | 0.35 | 0.52 |
| provides insight | 0.0 | 0.02 | 0.02 | 0.13 | 0.47 |
| provides insights | 0.0 | 0.01 | 0.01 | 0.28 | 0.52 |
| purportedly | 0.0 | 0.0 | 0.0 | — | — |
| putative | 0.01 | 0.03 | 0.02 | 0.24 | 0.52 |
| putatively | 0.0 | 0.0 | 0.0 | — | — |
| real world | 0.06 | 0.08 | 0.02 | 0.57 | 0.72 |
| real world evidence | 0.01 | 0.0 | -0.01 | 0.35 | 0.52 |
| real world scenario | 0.0 | 0.0 | 0.0 | — | — |
| real world setting | 0.03 | 0.02 | -0.01 | 0.78 | 0.86 |
| remarkably | 0.05 | 0.03 | -0.01 | 0.61 | 0.75 |
| reproducible | 0.01 | 0.02 | 0.01 | 0.48 | 0.63 |
| retrieval augmented | 0.0 | 0.0 | 0.0 | — | — |
| scalability | 0.0 | 0.0 | 0.0 | — | — |
| scalable | 0.0 | 0.0 | 0.0 | — | — |
| self reflection | 0.0 | 0.0 | 0.0 | — | — |
| sensitivity analysis | 0.0 | 0.01 | 0.01 | 0.28 | 0.52 |
| shed light on | 0.01 | 0.03 | 0.02 | 0.24 | 0.52 |
| sheds light on | 0.0 | 0.0 | 0.0 | — | — |
| significant decrease | 0.06 | 0.1 | 0.04 | 0.27 | 0.52 |
| significant improvement | 0.06 | 0.11 | 0.04 | 0.28 | 0.52 |
| significant increase | 0.05 | 0.12 | 0.07 | 0.06 | 0.36 |
| significantly | 0.84 | 0.86 | 0.02 | 0.73 | 0.84 |
| state of the art | 0.0 | 0.0 | 0.0 | — | — |
| strengths include | 0.0 | 0.0 | 0.0 | — | — |
| substantially | 0.03 | 0.03 | 0.0 | 0.85 | 0.92 |
| taken together | 0.04 | 0.03 | -0.0 | 0.85 | 0.92 |
| taken together these findings | 0.0 | 0.0 | 0.0 | — | — |
| tentative | 0.0 | 0.01 | 0.01 | 0.28 | 0.52 |
| tentatively | 0.0 | 0.0 | 0.0 | — | — |
| the current study | 0.68 | 0.65 | -0.03 | 0.65 | 0.76 |
| the present study | 0.34 | 0.41 | 0.07 | 0.33 | 0.52 |
| these findings | 0.17 | 0.32 | 0.16 | <0.01 | 0.16 |
| this investigation | 0.02 | 0.03 | 0.01 | 0.53 | 0.68 |
| this research | 0.24 | 0.27 | 0.03 | 0.65 | 0.76 |
| this study demonstrates | 0.0 | 0.05 | 0.05 | 0.01 | 0.16 |
| this study shows | 0.01 | 0.0 | -0.01 | 0.35 | 0.52 |
| threats to validity | 0.0 | 0.0 | 0.0 | — | — |
| to conclude | 0.02 | 0.04 | 0.02 | 0.31 | 0.52 |
| to summarize | 0.03 | 0.02 | -0.01 | 0.78 | 0.86 |
| to the best of our knowledge | 0.15 | 0.1 | -0.05 | 0.27 | 0.52 |
| transformative | 0.0 | 0.0 | 0.0 | — | — |
| underscore | 0.0 | 0.05 | 0.05 | 0.01 | 0.16 |
| underscored | 0.0 | 0.01 | 0.01 | 0.28 | 0.52 |
| underscores | 0.0 | 0.05 | 0.05 | 0.01 | 0.16 |
| underscoring | 0.0 | 0.02 | 0.02 | 0.13 | 0.47 |
| upstream | 0.01 | 0.02 | 0.01 | 0.48 | 0.63 |
| warrants further investigation | 0.0 | 0.02 | 0.02 | 0.13 | 0.47 |
| we demonstrate | 0.01 | 0.0 | -0.01 | 0.35 | 0.52 |
| we elucidate | 0.01 | 0.0 | -0.01 | 0.35 | 0.52 |
| we highlight | 0.0 | 0.0 | 0.0 | — | — |
| we provide evidence | 0.0 | 0.0 | 0.0 | — | — |
| we show that | 0.02 | 0.0 | -0.02 | 0.19 | 0.52 |
| we underscore | 0.0 | 0.0 | 0.0 | — | — |
| with respect to | 0.1 | 0.03 | -0.07 | 0.05 | 0.36 |
| workflow | 0.01 | 0.01 | 0.0 | 0.92 | 0.92 |
| zero shot | 0.0 | 0.0 | 0.0 | — | — |

**Q4**

**Connectors / Transitions**

| **Phrase/Term** | **Prevalence pre (%)** | **Prevalence post (%)** | **Δ Prevalence (%)** | **p-value** | **q-value** |
| --- | --- | --- | --- | --- | --- |
| accordingly | 0.07 | 0.09 | 0.02 | 0.53 | 0.67 |
| collectively | 0.01 | 0.02 | 0.01 | 0.46 | 0.59 |
| collectively our results | 0.0 | 0.0 | 0.0 | — | — |
| consequently | 0.09 | 0.08 | -0.01 | 0.88 | 0.93 |
| furthermore | 0.24 | 0.41 | 0.17 | 0.01 | 0.16 |
| hence | 0.07 | 0.1 | 0.04 | 0.37 | 0.52 |
| in conclusion | 0.47 | 0.22 | -0.25 | <0.01 | **0.02** |
| in summary | 0.06 | 0.06 | -0.0 | 0.99 | 0.99 |
| moreover | 0.28 | 0.43 | 0.16 | 0.02 | 0.18 |
| nevertheless | 0.09 | 0.18 | 0.1 | 0.05 | 0.27 |
| nonetheless | 0.02 | 0.02 | 0.0 | 0.86 | 0.93 |
| notwithstanding | 0.0 | 0.0 | 0.0 | — | — |
| therefore | 0.68 | 0.72 | 0.04 | 0.55 | 0.68 |

**Interpretive / Hedging**

| **Phrase/Term** | **Prevalence pre (%)** | **Prevalence post (%)** | **Δ Prevalence (%)** | **p-value** | **q-value** |
| --- | --- | --- | --- | --- | --- |
| apparently | 0.04 | 0.0 | -0.04 | 0.06 | 0.29 |
| arguably | 0.0 | 0.0 | 0.0 | — | — |
| importantly | 0.02 | 0.01 | -0.01 | 0.67 | 0.77 |
| notably | 0.03 | 0.19 | 0.16 | <0.01 | **0.02** |
| presumably | 0.0 | 0.01 | 0.01 | 0.27 | 0.44 |
| seemingly | 0.0 | 0.0 | 0.0 | — | — |
| to our knowledge | 0.05 | 0.14 | 0.09 | 0.03 | 0.19 |

**Technical / Statistical**

| **Phrase/Term** | **Prevalence pre (%)** | **Prevalence post (%)** | **Δ Prevalence (%)** | **p-value** | **q-value** |
| --- | --- | --- | --- | --- | --- |
| confidence interval | 0.12 | 0.19 | 0.07 | 0.19 | 0.44 |
| effect size | 0.0 | 0.05 | 0.05 | 0.03 | 0.18 |
| external validity | 0.0 | 0.0 | 0.0 | — | — |
| internal validity | 0.0 | 0.0 | 0.0 | — | — |
| reproducibility | 0.1 | 0.05 | -0.06 | 0.13 | 0.34 |
| robust | 0.01 | 0.08 | 0.07 | 0.02 | 0.16 |
| robust baseline | 0.0 | 0.0 | 0.0 | — | — |
| robustly | 0.0 | 0.0 | 0.0 | — | — |
| robustness | 0.0 | 0.0 | 0.0 | — | — |
| statistically significant | 0.72 | 0.6 | -0.12 | 0.07 | 0.32 |

**Other phrases**

| **Phrase/Term** | **Prevalence pre (%)** | **Prevalence post (%)** | **Δ Prevalence (%)** | **p-value** | **q-value** |
| --- | --- | --- | --- | --- | --- |
| RAG | 0.0 | 0.0 | 0.0 | — | — |
| RAG pipeline | 0.0 | 0.0 | 0.0 | — | — |
| ablation study | 0.0 | 0.0 | 0.0 | — | — |
| advance | 0.02 | 0.03 | 0.02 | 0.51 | 0.65 |
| advanced | 0.35 | 0.38 | 0.02 | 0.74 | 0.84 |
| advances | 0.14 | 0.11 | -0.03 | 0.55 | 0.68 |
| advancing | 0.0 | 0.01 | 0.01 | 0.27 | 0.44 |
| agentic | 0.0 | 0.0 | 0.0 | — | — |
| ameliorate | 0.0 | 0.0 | 0.0 | — | — |
| ameliorated | 0.0 | 0.01 | 0.01 | 0.27 | 0.44 |
| ameliorates | 0.01 | 0.02 | 0.01 | 0.46 | 0.59 |
| amelioration | 0.0 | 0.01 | 0.01 | 0.27 | 0.44 |
| as evidenced by | 0.01 | 0.01 | 0.0 | 0.90 | 0.93 |
| as such | 0.01 | 0.02 | 0.01 | 0.46 | 0.59 |
| baseline | 0.3 | 0.27 | -0.02 | 0.73 | 0.83 |
| benchmark | 0.0 | 0.01 | 0.01 | 0.27 | 0.44 |
| benchmarking | 0.0 | 0.0 | 0.0 | — | — |
| body of literature | 0.0 | 0.0 | 0.0 | — | — |
| catalyze | 0.0 | 0.0 | 0.0 | — | — |
| catalyzed | 0.01 | 0.0 | -0.01 | 0.36 | 0.50 |
| catalyzes | 0.01 | 0.0 | -0.01 | 0.36 | 0.50 |
| catalyzing | 0.0 | 0.0 | 0.0 | — | — |
| chain of thought | 0.0 | 0.0 | 0.0 | — | — |
| clinical implications | 0.01 | 0.03 | 0.02 | 0.23 | 0.44 |
| clinically meaningful | 0.0 | 0.0 | 0.0 | — | — |
| compelling | 0.01 | 0.01 | 0.0 | 0.90 | 0.93 |
| compelling evidence | 0.0 | 0.01 | 0.01 | 0.27 | 0.44 |
| crucially | 0.0 | 0.0 | 0.0 | — | — |
| cumulatively | 0.0 | 0.0 | 0.0 | — | — |
| cutting edge | 0.0 | 0.0 | 0.0 | — | — |
| data drift | 0.0 | 0.0 | 0.0 | — | — |
| data driven | 0.0 | 0.01 | 0.01 | 0.27 | 0.44 |
| domain agnostic | 0.0 | 0.0 | 0.0 | — | — |
| domain shift | 0.0 | 0.0 | 0.0 | — | — |
| downstream | 0.01 | 0.02 | 0.01 | 0.46 | 0.59 |
| effectiveness | 0.23 | 0.38 | 0.15 | 0.03 | 0.18 |
| efficacy | 0.21 | 0.33 | 0.12 | 0.06 | 0.28 |
| elucidate | 0.03 | 0.06 | 0.03 | 0.33 | 0.50 |
| elucidated | 0.03 | 0.01 | -0.02 | 0.40 | 0.55 |
| elucidates | 0.0 | 0.0 | 0.0 | — | — |
| elucidation | 0.0 | 0.01 | 0.01 | 0.27 | 0.44 |
| end to end | 0.0 | 0.02 | 0.02 | 0.12 | 0.34 |
| error bars | 0.0 | 0.01 | 0.01 | 0.27 | 0.44 |
| evidence based | 0.01 | 0.08 | 0.07 | 0.02 | 0.16 |
| facilitate | 0.16 | 0.17 | 0.01 | 0.87 | 0.93 |
| facilitated | 0.03 | 0.0 | -0.03 | 0.11 | 0.34 |
| facilitates | 0.05 | 0.05 | -0.0 | 0.94 | 0.97 |
| facilitating | 0.0 | 0.05 | 0.05 | 0.03 | 0.18 |
| few shot | 0.0 | 0.0 | 0.0 | — | — |
| fine tune | 0.0 | 0.0 | 0.0 | — | — |
| fine tuned | 0.0 | 0.0 | 0.0 | — | — |
| foundation model | 0.0 | 0.0 | 0.0 | — | — |
| framework | 0.01 | 0.03 | 0.02 | 0.23 | 0.44 |
| future work should | 0.0 | 0.0 | 0.0 | — | — |
| generalizability | 0.01 | 0.11 | 0.1 | <0.01 | 0.05 |
| generalizable | 0.0 | 0.01 | 0.01 | 0.27 | 0.44 |
| ground truth | 0.0 | 0.0 | 0.0 | — | — |
| groundbreaking | 0.0 | 0.0 | 0.0 | — | — |
| growing body of evidence | 0.0 | 0.0 | 0.0 | — | — |
| guardrail | 0.0 | 0.0 | 0.0 | — | — |
| guardrails | 0.0 | 0.0 | 0.0 | — | — |
| hallucination | 0.0 | 0.01 | 0.01 | 0.27 | 0.44 |
| hallucinations | 0.01 | 0.01 | 0.0 | 0.90 | 0.93 |
| harness | 0.0 | 0.0 | 0.0 | — | — |
| harnessing | 0.0 | 0.01 | 0.01 | 0.27 | 0.44 |
| highly significant | 0.03 | 0.02 | -0.01 | 0.80 | 0.89 |
| holistic | 0.0 | 0.01 | 0.01 | 0.27 | 0.44 |
| holistically | 0.01 | 0.0 | -0.01 | 0.36 | 0.50 |
| illuminate | 0.0 | 0.0 | 0.0 | — | — |
| illuminated | 0.0 | 0.02 | 0.02 | 0.12 | 0.34 |
| illuminates | 0.0 | 0.0 | 0.0 | — | — |
| illuminating | 0.0 | 0.0 | 0.0 | — | — |
| implications for practice | 0.0 | 0.0 | 0.0 | — | — |
| implications for research | 0.0 | 0.0 | 0.0 | — | — |
| in brief | 0.01 | 0.03 | 0.02 | 0.23 | 0.44 |
| in closing | 0.0 | 0.0 | 0.0 | — | — |
| in light of | 0.07 | 0.07 | 0.0 | 0.97 | 0.98 |
| in short | 0.02 | 0.01 | -0.01 | 0.67 | 0.77 |
| in sum | 0.0 | 0.0 | 0.0 | — | — |
| in this context | 0.03 | 0.03 | 0.01 | 0.83 | 0.91 |
| in this paper | 0.0 | 0.01 | 0.01 | 0.27 | 0.44 |
| in this setting | 0.0 | 0.0 | 0.0 | — | — |
| in this study | 0.57 | 0.77 | 0.2 | <0.01 | 0.07 |
| in this work | 0.0 | 0.0 | 0.0 | — | — |
| instruction tuned | 0.0 | 0.0 | 0.0 | — | — |
| interestingly | 0.05 | 0.1 | 0.05 | 0.14 | 0.39 |
| key contribution | 0.0 | 0.0 | 0.0 | — | — |
| key takeaway | 0.0 | 0.0 | 0.0 | — | — |
| key takeaways | 0.0 | 0.0 | 0.0 | — | — |
| large language model | 0.0 | 0.03 | 0.03 | 0.06 | 0.28 |
| leverage | 0.0 | 0.02 | 0.02 | 0.12 | 0.34 |
| leveraged | 0.0 | 0.0 | 0.0 | — | — |
| leverages | 0.0 | 0.0 | 0.0 | — | — |
| leveraging | 0.0 | 0.02 | 0.02 | 0.12 | 0.34 |
| limitations include | 0.01 | 0.0 | -0.01 | 0.36 | 0.50 |
| major contribution | 0.0 | 0.01 | 0.01 | 0.27 | 0.44 |
| markedly | 0.04 | 0.07 | 0.03 | 0.35 | 0.50 |
| meaningful improvement | 0.0 | 0.0 | 0.0 | — | — |
| meaningfully better | 0.0 | 0.0 | 0.0 | — | — |
| methodological | 0.02 | 0.08 | 0.06 | 0.05 | 0.27 |
| methodology | 0.04 | 0.19 | 0.16 | <0.01 | **0.02** |
| mitigate | 0.01 | 0.05 | 0.04 | 0.12 | 0.34 |
| mitigated | 0.0 | 0.02 | 0.02 | 0.12 | 0.34 |
| mitigates | 0.0 | 0.0 | 0.0 | — | — |
| mitigation | 0.0 | 0.0 | 0.0 | — | — |
| model agnostic | 0.0 | 0.0 | 0.0 | — | — |
| move the needle | 0.0 | 0.0 | 0.0 | — | — |
| noteworthily | 0.0 | 0.0 | 0.0 | — | — |
| noteworthy | 0.06 | 0.1 | 0.05 | 0.24 | 0.44 |
| novel | 0.17 | 0.22 | 0.04 | 0.43 | 0.59 |
| novel contribution | 0.0 | 0.0 | 0.0 | — | — |
| novelty | 0.0 | 0.02 | 0.02 | 0.12 | 0.34 |
| offers insight | 0.0 | 0.0 | 0.0 | — | — |
| offers insights | 0.0 | 0.0 | 0.0 | — | — |
| opens the door | 0.0 | 0.0 | 0.0 | — | — |
| optimization | 0.02 | 0.07 | 0.05 | 0.09 | 0.34 |
| optimize | 0.03 | 0.06 | 0.03 | 0.33 | 0.50 |
| optimized | 0.02 | 0.01 | -0.01 | 0.67 | 0.77 |
| optimizes | 0.0 | 0.0 | 0.0 | — | — |
| optimizing | 0.02 | 0.07 | 0.05 | 0.09 | 0.34 |
| ostensible | 0.0 | 0.0 | 0.0 | — | — |
| ostensibly | 0.0 | 0.0 | 0.0 | — | — |
| our findings | 0.24 | 0.2 | -0.03 | 0.58 | 0.70 |
| paradigm | 0.06 | 0.01 | -0.05 | 0.09 | 0.34 |
| paradigm shift | 0.01 | 0.0 | -0.01 | 0.36 | 0.50 |
| paradigmatic | 0.0 | 0.0 | 0.0 | — | — |
| paves the way | 0.0 | 0.0 | 0.0 | — | — |
| pipeline | 0.0 | 0.05 | 0.05 | 0.03 | 0.18 |
| post train | 0.0 | 0.0 | 0.0 | — | — |
| post trained | 0.0 | 0.0 | 0.0 | — | — |
| practical implications | 0.0 | 0.0 | 0.0 | — | — |
| pre trained | 0.0 | 0.03 | 0.03 | 0.06 | 0.28 |
| pretrain | 0.0 | 0.0 | 0.0 | — | — |
| primary contribution | 0.0 | 0.0 | 0.0 | — | — |
| promising | 0.09 | 0.15 | 0.06 | 0.18 | 0.44 |
| prompt | 0.03 | 0.09 | 0.06 | 0.06 | 0.29 |
| prompting | 0.0 | 0.01 | 0.01 | 0.27 | 0.44 |
| provides insight | 0.0 | 0.01 | 0.01 | 0.27 | 0.44 |
| provides insights | 0.0 | 0.0 | 0.0 | — | — |
| purportedly | 0.0 | 0.0 | 0.0 | — | — |
| putative | 0.0 | 0.01 | 0.01 | 0.27 | 0.44 |
| putatively | 0.0 | 0.0 | 0.0 | — | — |
| real world | 0.02 | 0.09 | 0.07 | 0.02 | 0.18 |
| real world evidence | 0.01 | 0.01 | 0.0 | 0.90 | 0.93 |
| real world scenario | 0.0 | 0.01 | 0.01 | 0.27 | 0.44 |
| real world setting | 0.0 | 0.02 | 0.02 | 0.12 | 0.34 |
| remarkably | 0.04 | 0.01 | -0.03 | 0.24 | 0.44 |
| reproducible | 0.08 | 0.03 | -0.04 | 0.21 | 0.44 |
| retrieval augmented | 0.0 | 0.0 | 0.0 | — | — |
| scalability | 0.0 | 0.02 | 0.02 | 0.12 | 0.34 |
| scalable | 0.0 | 0.02 | 0.02 | 0.12 | 0.34 |
| self reflection | 0.0 | 0.0 | 0.0 | — | — |
| sensitivity analysis | 0.0 | 0.0 | 0.0 | — | — |
| shed light on | 0.02 | 0.01 | -0.01 | 0.67 | 0.77 |
| sheds light on | 0.0 | 0.02 | 0.02 | 0.12 | 0.34 |
| significant decrease | 0.1 | 0.08 | -0.03 | 0.55 | 0.68 |
| significant improvement | 0.05 | 0.06 | 0.01 | 0.77 | 0.87 |
| significant increase | 0.18 | 0.11 | -0.07 | 0.19 | 0.44 |
| significantly | 0.73 | 0.64 | -0.1 | 0.15 | 0.39 |
| state of the art | 0.0 | 0.02 | 0.02 | 0.12 | 0.34 |
| strengths include | 0.0 | 0.0 | 0.0 | — | — |
| substantially | 0.05 | 0.03 | -0.01 | 0.64 | 0.76 |
| taken together | 0.0 | 0.05 | 0.05 | 0.03 | 0.18 |
| taken together these findings | 0.0 | 0.0 | 0.0 | — | — |
| tentative | 0.0 | 0.0 | 0.0 | — | — |
| tentatively | 0.0 | 0.0 | 0.0 | — | — |
| the current study | 0.16 | 0.11 | -0.05 | 0.34 | 0.50 |
| the present study | 0.61 | 0.39 | -0.22 | <0.01 | 0.05 |
| these findings | 0.29 | 0.25 | -0.04 | 0.58 | 0.70 |
| this investigation | 0.0 | 0.0 | 0.0 | — | — |
| this research | 0.06 | 0.14 | 0.08 | 0.06 | 0.28 |
| this study demonstrates | 0.01 | 0.0 | -0.01 | 0.36 | 0.50 |
| this study shows | 0.01 | 0.02 | 0.01 | 0.46 | 0.59 |
| threats to validity | 0.0 | 0.0 | 0.0 | — | — |
| to conclude | 0.01 | 0.0 | -0.01 | 0.36 | 0.50 |
| to summarize | 0.01 | 0.01 | 0.0 | 0.90 | 0.93 |
| to the best of our knowledge | 0.11 | 0.11 | -0.0 | 0.99 | 0.99 |
| transformative | 0.0 | 0.01 | 0.01 | 0.27 | 0.44 |
| underscore | 0.0 | 0.05 | 0.05 | 0.03 | 0.18 |
| underscored | 0.0 | 0.0 | 0.0 | — | — |
| underscores | 0.01 | 0.1 | 0.09 | <0.01 | 0.07 |
| underscoring | 0.0 | 0.06 | 0.06 | 0.01 | 0.16 |
| upstream | 0.0 | 0.0 | 0.0 | — | — |
| warrants further investigation | 0.0 | 0.0 | 0.0 | — | — |
| we demonstrate | 0.0 | 0.01 | 0.01 | 0.27 | 0.44 |
| we elucidate | 0.0 | 0.0 | 0.0 | — | — |
| we highlight | 0.0 | 0.0 | 0.0 | — | — |
| we provide evidence | 0.0 | 0.0 | 0.0 | — | — |
| we show that | 0.01 | 0.0 | -0.01 | 0.36 | 0.50 |
| we underscore | 0.0 | 0.0 | 0.0 | — | — |
| with respect to | 0.11 | 0.02 | -0.09 | 0.01 | 0.16 |
| workflow | 0.0 | 0.0 | 0.0 | — | — |
| zero shot | 0.0 | 0.01 | 0.01 | 0.27 | 0.44 |

Prevalence refers to the proportion of articles containing each term within a journal quartile and time period. Δ Prevalence denotes the absolute difference between the pre-LLM (2018–2020) and post-LLM (2023–2025) periods. p-values were obtained from two-proportion tests. q-values represent false discovery rate–adjusted p-values using the Benjamini–Hochberg method. Bold q-values indicate significance at an FDR threshold of 0.05.
