# Supplementary material
Source: Research Square preprint supplement (doi:10.21203/rs.3.rs-9082140/v1)
Supplement: Supplementary file 3 [file ce6b6d2d36e095fe9c23fb34.docx]

**Article Title:**

Large Language Models and Shifts in Scholarly Writing Style: A Cross-Journal Quantitative Analysis of Ophthalmology Research Articles

**Journal:**

Scientometrics

**Authors:**

Tom Kornhauser, MD (ORCID: https://orcid.org/0000-0002-9140-2982)

Tolossa Tufa Regassa, MD

Morris E. Hartstein, MD, FACS

**Corresponding Author:**

Tom Kornhauser, MD

Department of Ophthalmology

Shamir Medical Center

Zerifin 70300, Israel

Email: tomchook@gmail.com

**Supplementary Table S2. Punctuation rates, post:pre rate ratios, and p values by quartile.**

**Q1**

| **Punctuation** | **Symbol** | **Pre Rate per 1000** | **Post Rate per 1000** | **Rate Ratio** | **95% CI** | **p-value** | **Direction** |
| --- | --- | --- | --- | --- | --- | --- | --- |
| Double Quotation | " | 0.01 | 0.03 | 3.04 | (1.49 to 6.22) | **<0.01** | ↑ |
| Apostrophe | ' | 0.02 | 0.0 | 0.03 | (0.00 to 0.47) | — | ↓ |
| Right Brace | } | 0.0 | 0.0 | 0.17 | (0.01 to 3.37) | 0.23 | ↓ |
| Exclamation Mark | ! | 0.01 | 0.0 | 0.2 | (0.04 to 0.92) | **0.04** | ↓ |
| En Dash | – | 0.29 | 0.19 | 0.65 | (0.54 to 0.79) | **<0.01** | ↓ |
| Forward Slash | / | 6.35 | 7.82 | 1.23 | (1.19 to 1.28) | **<0.01** | ↑ |
| Right Bracket | ] | 1.08 | 1.3 | 1.2 | (1.10 to 1.31) | **<0.01** | ↑ |
| Colon | : | 21.87 | 19.14 | 0.87 | (0.86 to 0.89) | **<0.01** | ↓ |
| Left Brace | { | 0.08 | 0.09 | 1.1 | (0.80 to 1.52) | 0.56 | ↑ |
| Em Dash | — | 0.01 | 0.01 | 0.9 | (0.35 to 2.33) | 0.83 | ↓ |
| Hyphen | - | 32.03 | 29.3 | 0.91 | (0.90 to 0.93) | **<0.01** | ↓ |
| Period (Full Stop) | . | 117.87 | 127.55 | 1.08 | (1.07 to 1.09) | **<0.01** | ↑ |
| Left Bracket | [ | 1.53 | 1.64 | 1.07 | (1.00 to 1.16) | 0.07 | ↑ |
| Left Parenthesis | ( | 42.61 | 45.5 | 1.07 | (1.05 to 1.08) | **<0.01** | ↑ |
| Right Parenthesis | ) | 42.62 | 45.49 | 1.07 | (1.05 to 1.08) | **<0.01** | ↑ |
| Underscore | _ | 0.2 | 0.19 | 0.93 | (0.75 to 1.14) | 0.50 | ↓ |
| Semicolon | ; | 13.38 | 13.07 | 0.98 | (0.95 to 1.00) | 0.12 | ↓ |
| Backslash | \ | 0.0 | 0.0 | 1.01 | (0.02 to 51.07) | 1.00 | ↑ |
| Question Mark | ? | 0.16 | 0.16 | 1.01 | (0.80 to 1.27) | 0.93 | ↑ |
| Comma | , | 74.02 | 74.2 | 1.0 | (0.99 to 1.01) | 1.00 | = |

**Q2**

| **Punctuation** | **Symbol** | **Pre Rate per 1000** | **Post Rate per 1000** | **Rate Ratio** | **95% CI** | **p-value** | **Direction** |
| --- | --- | --- | --- | --- | --- | --- | --- |
| Left Brace | { | 0.0 | 0.07 | 37.47 | (5.13 to 273.48) | **<0.01** | ↑ |
| Right Brace | } | 0.0 | 0.07 | 37.47 | (5.13 to 273.48) | **<0.01** | ↑ |
| Double Quotation | " | 0.01 | 0.13 | 18.2 | (6.64 to 49.88) | **<0.01** | ↑ |
| Apostrophe | ' | 0.38 | 2.26 | 6.0 | (5.18 to 6.94) | **<0.01** | ↑ |
| Underscore | _ | 0.12 | 0.37 | 3.18 | (2.41 to 4.20) | **<0.01** | ↑ |
| Question Mark | ? | 0.22 | 0.32 | 1.48 | (1.17 to 1.87) | **<0.01** | ↑ |
| Em Dash | — | 0.25 | 0.16 | 0.65 | (0.50 to 0.85) | **<0.01** | ↓ |
| Forward Slash | / | 17.36 | 23.11 | 1.33 | (1.30 to 1.37) | **<0.01** | ↑ |
| Colon | : | 14.06 | 17.27 | 1.23 | (1.19 to 1.27) | **<0.01** | ↑ |
| Semicolon | ; | 4.18 | 3.42 | 0.82 | (0.77 to 0.87) | **<0.01** | ↓ |
| Period (Full Stop) | . | 96.63 | 107.02 | 1.11 | (1.09 to 1.12) | **<0.01** | ↑ |
| En Dash | – | 10.33 | 9.23 | 0.89 | (0.86 to 0.93) | **<0.01** | ↓ |
| Hyphen | - | 37.49 | 40.71 | 1.09 | (1.07 to 1.11) | **<0.01** | ↑ |
| Backslash | \ | 0.0 | 0.0 | 1.07 | (0.02 to 53.95) | 0.97 | ↑ |
| Exclamation Mark | ! | 0.0 | 0.0 | 1.07 | (0.02 to 53.95) | 0.97 | ↑ |
| Left Bracket | [ | 6.4 | 6.73 | 1.05 | (1.00 to 1.10) | **0.04** | ↑ |
| Right Bracket | ] | 6.4 | 6.73 | 1.05 | (1.00 to 1.10) | **0.04** | ↑ |
| Left Parenthesis | ( | 37.21 | 35.65 | 0.96 | (0.94 to 0.98) | **<0.01** | ↓ |
| Right Parenthesis | ) | 37.21 | 35.65 | 0.96 | (0.94 to 0.98) | **<0.01** | ↓ |
| Comma | , | 69.77 | 70.86 | 1.02 | (1.00 to 1.03) | **<0.01** | ↑ |

**Q3**

| **Punctuation** | **Symbol** | **Pre Rate per 1000** | **Post Rate per 1000** | **Rate Ratio** | **95% CI** | **p-value** | **Direction** |
| --- | --- | --- | --- | --- | --- | --- | --- |
| Double Quotation | " | 0.0 | 0.07 | 17.37 | (4.17 to 72.38) | **<0.01** | ↑ |
| Underscore | _ | 0.08 | 0.69 | 8.96 | (6.43 to 12.49) | **<0.01** | ↑ |
| Exclamation Mark | ! | 0.0 | 0.0 | 4.21 | (0.19 to 93.37) | 0.36 | ↑ |
| Question Mark | ? | 0.09 | 0.37 | 4.01 | (2.91 to 5.53) | **<0.01** | ↑ |
| Apostrophe | ' | 0.25 | 0.04 | 0.18 | (0.11 to 0.28) | **<0.01** | ↓ |
| Em Dash | — | 0.05 | 0.07 | 1.49 | (0.88 to 2.51) | 0.14 | ↑ |
| Forward Slash | / | 8.83 | 12.1 | 1.37 | (1.32 to 1.43) | **<0.01** | ↑ |
| En Dash | – | 9.49 | 7.68 | 0.81 | (0.78 to 0.85) | **<0.01** | ↓ |
| Semicolon | ; | 11.04 | 9.1 | 0.82 | (0.79 to 0.86) | **<0.01** | ↓ |
| Hyphen | - | 35.39 | 40.08 | 1.13 | (1.11 to 1.16) | **<0.01** | ↑ |
| Colon | : | 17.24 | 15.12 | 0.88 | (0.85 to 0.90) | **<0.01** | ↓ |
| Backslash | \ | 0.0 | 0.0 | 1.05 | (0.02 to 53.05) | 0.98 | ↑ |
| Left Brace | { | 0.0 | 0.0 | 1.05 | (0.07 to 16.83) | 0.97 | ↑ |
| Right Brace | } | 0.0 | 0.0 | 1.05 | (0.07 to 16.83) | 0.97 | ↑ |
| Left Bracket | [ | 6.3 | 6.54 | 1.04 | (0.99 to 1.09) | 0.11 | ↑ |
| Left Parenthesis | ( | 32.58 | 31.19 | 0.96 | (0.94 to 0.98) | **<0.01** | ↓ |
| Right Bracket | ] | 6.3 | 6.53 | 1.04 | (0.99 to 1.09) | 0.11 | ↑ |
| Right Parenthesis | ) | 32.71 | 31.33 | 0.96 | (0.94 to 0.98) | **<0.01** | ↓ |
| Comma | , | 72.39 | 74.34 | 1.03 | (1.01 to 1.04) | **<0.01** | ↑ |
| Period (Full Stop) | . | 117.97 | 119.7 | 1.01 | (1.00 to 1.03) | 0.19 | ↑ |

**Q4**

| **Punctuation** | **Symbol** | **Pre Rate per 1000** | **Post Rate per 1000** | **Rate Ratio** | **95% CI** | **p-value** | **Direction** |
| --- | --- | --- | --- | --- | --- | --- | --- |
| Em Dash | — | 0.0 | 0.04 | 28.87 | (1.73 to 483.30) | **0.02** | ↑ |
| Apostrophe | ' | 0.0 | 0.02 | 17.32 | (1.00 to 298.85) | 0.05 | ↑ |
| En Dash | – | 0.15 | 1.79 | 12.06 | (9.25 to 15.72) | **<0.01** | ↑ |
| Right Brace | } | 0.0 | 0.0 | 3.85 | (0.17 to 85.38) | 0.40 | ↑ |
| Right Bracket | ] | 0.14 | 0.44 | 3.16 | (2.34 to 4.27) | **<0.01** | ↑ |
| Left Bracket | [ | 0.14 | 0.44 | 3.11 | (2.31 to 4.18) | **<0.01** | ↑ |
| Underscore | _ | 0.07 | 0.14 | 2.03 | (1.29 to 3.21) | **<0.01** | ↑ |
| Exclamation Mark | ! | 0.01 | 0.01 | 1.92 | (0.35 to 10.51) | 0.45 | ↑ |
| Left Brace | { | 0.0 | 0.0 | 1.92 | (0.17 to 21.23) | 0.60 | ↑ |
| Forward Slash | / | 4.29 | 7.22 | 1.68 | (1.58 to 1.79) | **<0.01** | ↑ |
| Double Quotation | " | 0.01 | 0.01 | 1.44 | (0.41 to 5.12) | 0.57 | ↑ |
| Semicolon | ; | 9.99 | 7.5 | 0.75 | (0.72 to 0.79) | **<0.01** | ↓ |
| Left Parenthesis | ( | 25.71 | 30.19 | 1.17 | (1.14 to 1.21) | **<0.01** | ↑ |
| Right Parenthesis | ) | 26.11 | 30.4 | 1.16 | (1.13 to 1.19) | **<0.01** | ↑ |
| Question Mark | ? | 0.25 | 0.26 | 1.06 | (0.81 to 1.39) | 0.67 | ↑ |
| Backslash | \ | 0.0 | 0.0 | 0.96 | (0.02 to 48.51) | 0.98 | ↓ |
| Comma | , | 84.99 | 86.73 | 1.02 | (1.01 to 1.04) | **<0.01** | ↑ |
| Hyphen | - | 32.57 | 31.99 | 0.98 | (0.96 to 1.01) | 0.12 | ↓ |
| Period (Full Stop) | . | 119.67 | 122.07 | 1.02 | (1.01 to 1.03) | **<0.01** | ↑ |
| Colon | : | 20.19 | 19.93 | 0.99 | (0.96 to 1.02) | 0.52 | ↓ |

Rates are shown per 1,000 tokens, with rate ratios comparing post-LLM (2023–2025) to pre-LLM (2018–2020) periods. p-values are shown for comparison of rate ratios between periods; bold p-values indicate p < 0.05. Arrows indicate the direction of change (↑ increase, ↓ decrease, = no change) for statistically significant comparisons. Dashes (—) denote values not computable due to zero counts or undefined ratios.
